# Supplementary material for: A new high-precision method for determining stable chlorine isotopes in halite and igneous rock samples using UV-femtosecond laser ablation multiple Faraday collector inductively coupled plasma mass spectrometry
Source: Royal Society of Chemistry journal article supplement (doi:10.1039/c5ja00268k), 2015-01-01
Supplement: c5ja00268k1.pdf [file c5ja00268k1.pdf]

**Electronic supplementary information (ESI) Data Table 1:** Analytical results of AgCl chemical reagents.

| Run   | Sample ID       | Remarks                   | <sup>35</sup> Cl* | <sup>36</sup> Ar | <sup>37</sup> Cl* | <sup>38</sup> Ar | <sup>39</sup> K* | <sup>40</sup> Ar <sup>1</sup> H | <sup>35</sup> Cl/ <sup>37</sup> Cl* | <sup>36</sup> Ar/ <sup>38</sup> Ar | <sup>37</sup> Cl/ <sup>35</sup> Cl | 2SE             | 2SE% <sub>0</sub> |
|-------|-----------------|---------------------------|-------------------|------------------|-------------------|------------------|------------------|---------------------------------|-------------------------------------|------------------------------------|------------------------------------|-----------------|-------------------|
| Run1  | AgCl (Kanto)-1  | FsLA/266/90µm/60µmRR/10Hz | 1.24710           | 1.37447          | 0.44838           | 1.37405          | 0.00697          | 2.35163                         | 2.78126                             | 0.00587                            | 0.338457                           | 0.000028        | 0.08              |
| Run2  | AgCl (Kanto)-2  | FsLA/266/90µm/60µmRR/10Hz | 1.26567           | 1.26985          | 0.45384           | 1.26730          | 0.00648          | 4.05255                         | 2.78868                             | 0.00526                            | 0.338441                           | 0.000028        | 0.08              |
| Run3  | AgCl (Kanto)-3  | FsLA/266/90µm/60µmRR/10Hz | 1.26381           | 1.25177          | 0.45146           | 1.25002          | 0.00722          | 2.01327                         | 2.79924                             | 0.00554                            | 0.338404                           | 0.000028        | 0.08              |
| Run4  | AgCl (Kanto)-4  | FsLA/266/90µm/60µmRR/10Hz | 1.23059           | 1.16671          | 0.43908           | 1.16565          | 0.00567          | 1.43368                         | 2.80256                             | 0.00463                            | 0.338409                           | 0.000041        | 0.12              |
| Run5  | AgCl (Kanto)-5  | FsLA/266/90µm/60µmRR/10Hz | 1.22319           | 1.09309          | 0.43599           | 1.09074          | 0.00551          | 1.49246                         | 2.80542                             | 0.00491                            | 0.338415                           | 0.000039        | 0.11              |
| Run6  | AgCl (Kanto)-6  | FsLA/266/90µm/60µmRR/10Hz | 1.21169           | 1.09001          | 0.43158           | 1.08730          | 0.00535          | 1.40365                         | 2.80744                             | 0.00538                            | 0.338414                           | 0.000035        | 0.10              |
| Run7  | AgCl (Kanto)-7  | FsLA/266/90µm/60µmRR/10Hz | 1.21768           | 1.15146          | 0.43334           | 1.14991          | 0.00513          | 1.32773                         | 2.80984                             | 0.00447                            | 0.338419                           | 0.000030        | 0.09              |
| Run8  | AgCl (Kanto)-8  | FsLA/266/90µm/60µmRR/10Hz | 1.24096           | 1.22894          | 0.44114           | 1.22798          | 0.00504          | 1.43219                         | 2.81291                             | 0.00485                            | 0.338432                           | 0.000030        | 0.09              |
| Run9  | AgCl (Kanto)-9  | FsLA/266/90µm/60µmRR/10Hz | 1.24538           | 1.06363          | 0.44246           | 1.06461          | 0.00498          | 3.24254                         | 2.81450                             | 0.00651                            | 0.338424                           | 0.000030        | 0.09              |
| Run10 | AgCl (Kanto)-10 | FsLA/266/90µm/60µmRR/10Hz | 1.20311           | 1.09667          | 0.42773           | 1.09518          | 0.00482          | 1.35935                         | 2.81264                             | 0.00468                            | 0.338432                           | 0.000032        | 0.09              |
| Run11 | AgCl(ARD)-1     | FsLA/266/90µm/60µmRR/10Hz | 1.18659           | 1.10210          | 0.42174           | 1.10263          | 0.00441          | 1.40093                         | 2.81345                             | 0.00562                            | 0.338477                           | 0.000023        | 0.07              |
| Run12 | AgCl(ARD)-2     | FsLA/266/90µm/60µmRR/10Hz | 1.16315           | 1.08845          | 0.41349           | 1.08929          | 0.00452          | 1.41065                         | 2.81286                             | 0.00540                            | 0.338508                           | 0.000046        | 0.14              |
|       |                 |                           |                   |                  |                   |                  |                  |                                 |                                     | <b>2SD</b>                         | <b>0.338419</b>                    | <b>0.000042</b> | <b>0.12</b>       |
| Run19 | AgCl (Kanto)-13 | FsLA/266/90µm/60µmRR/10Hz | 1.18867           | 1.07806          | 0.42151           | 1.07849          | 0.00410          | 1.66750                         | 2.81995                             | 0.00421                            | 0.338782                           | 0.000045        | 0.13              |
| Run20 | AgCl (Kanto)-14 | FsLA/266/90µm/60µmRR/10Hz | 1.18240           | 1.04422          | 0.41916           | 1.04436          | 0.00404          | 1.31332                         | 2.82081                             | 0.00503                            | 0.338796                           | 0.000041        | 0.12              |
| Run21 | AgCl (Kanto)-15 | FsLA/266/90µm/60µmRR/10Hz | 1.20148           | 1.06497          | 0.42575           | 1.06581          | 0.00394          | 1.44155                         | 2.82184                             | 0.00562                            | 0.338792                           | 0.000047        | 0.14              |
| Run22 | AgCl (Kanto)-16 | FsLA/266/90µm/60µmRR/10Hz | 1.21500           | 1.16895          | 0.43071           | 1.16791          | 0.00458          | 1.55259                         | 2.82076                             | 0.00442                            | 0.338767                           | 0.000047        | 0.14              |
| Run24 | AgCl (Kanto)-18 | FsLA/266/90µm/60µmRR/10Hz | 1.18137           | 1.18246          | 0.41866           | 1.18424          | 0.00396          | 1.36615                         | 2.82170                             | 0.00621                            | 0.338813                           | 0.000039        | 0.12              |
| Run25 | AgCl (Kanto)-19 | FsLA/266/90µm/60µmRR/10Hz | 1.21482           | 1.04673          | 0.43029           | 1.04803          | 0.00391          | 3.58446                         | 2.82307                             | 0.00538                            | 0.338859                           | 0.000032        | 0.09              |
| Run26 | AgCl (Kanto)-20 | FsLA/266/90µm/60µmRR/10Hz | 1.23623           | 1.19046          | 0.43781           | 1.19269          | 0.00391          | 1.41441                         | 2.82355                             | 0.00569                            | 0.338832                           | 0.000040        | 0.12              |
| Run27 | AgCl (Kanto)-21 | FsLA/266/90µm/60µmRR/10Hz | 1.25039           | 1.02189          | 0.44274           | 1.02202          | 0.00390          | 2.89370                         | 2.82409                             | 0.00547                            | 0.338807                           | 0.000039        | 0.11              |
| Run28 | AgCl (Kanto)-22 | FsLA/266/90µm/60µmRR/10Hz | 1.23010           | 1.11882          | 0.43561           | 1.12173          | 0.00382          | 1.33038                         | 2.82375                             | 0.00685                            | 0.338810                           | 0.000036        | 0.11              |
| Run29 | AgCl (Kanto)-23 | FsLA/266/90µm/60µmRR/10Hz | 1.22814           | 1.04690          | 0.43495           | 1.04731          | 0.00375          | 3.21497                         | 2.82350                             | 0.00441                            | 0.338815                           | 0.000030        | 0.09              |
|       |                 |                           |                   |                  |                   |                  |                  |                                 |                                     | <b>2SD</b>                         | <b>0.338809</b>                    | <b>0.000047</b> | <b>0.14</b>       |
| Run23 | AgCl (Kanto)-17 | FsLA/266/90µm/60µmRR/15Hz | 1.86534           | 1.56108          | 0.65828           | 1.56038          | 0.00418          | 4.06443                         | 2.83359                             | 0.00633                            | 0.338926                           | 0.000050        | 0.15              |
| Run13 | AgCl(ARD)-3     | FsLA/266/90µm/60µmRR/10Hz | 1.15975           | 1.07913          | 0.41226           | 1.07817          | 0.00462          | 1.52055                         | 2.81300                             | 0.00491                            | 0.338496                           | 0.000046        | 0.14              |
| Run14 | AgCl(ARD)-4     | FsLA/266/90µm/60µmRR/10Hz | 1.04261           | 0.91705          | 0.37104           | 0.91844          | 0.00436          | 1.25558                         | 2.80829                             | 0.00665                            | 0.338397                           | 0.000042        | 0.12              |
| Run15 | AgCl(SC)-1      | FsLA/266/90µm/60µmRR/10Hz | 1.18105           | 0.97017          | 0.41915           | 0.97156          | 0.00415          | 1.36399                         | 2.81746                             | 0.00627                            | 0.338183                           | 0.000055        | 0.16              |
| Run16 | AgCl(SC)-2      | FsLA/266/90µm/60µmRR/10Hz | 1.13887           | 0.99102          | 0.40448           | 0.99151          | 0.00407          | 1.41826                         | 2.81532                             | 0.00594                            | 0.338314                           | 0.000054        | 0.16              |
|       |                 |                           |                   |                  |                   |                  |                  |                                 |                                     | <b>2SD</b>                         | <b>0.338470</b>                    | <b>0.000100</b> | <b>0.30</b>       |
| Run17 | AgCl (Kanto)-11 | FsLA/266/90µm/60µmRR/10Hz | 1.23072           | 1.11892          | 0.43670           | 1.11874          | 0.00429          | 1.73994                         | 2.81802                             | 0.00610                            | 0.338407                           | 0.000030        | 0.09              |
| Run18 | AgCl (Kanto)-12 | FsLA/266/90µm/60µmRR/10Hz | 1.22283           | 1.13343          | 0.43387           | 1.13324          | 0.00431          | 1.59203                         | 2.81826                             | 0.00499                            | 0.338373                           | 0.000036        | 0.11              |
|       |                 |                           |                   |                  |                   |                  |                  |                                 |                                     | <b>2SD</b>                         | <b>0.338249</b>                    | <b>0.000186</b> | <b>0.55</b>       |

Note: 2SD: 2-standard deviation; SE: standard error (n = 20 for all measurement); \*: signal intensity and isotope ratios from samples.

**Electronic supplementary information (ESI) Data Table 2: Analytical results of halite samples.**

| Run   | Sample ID       | Remarks                   | <sup>35</sup> Cl* | <sup>36</sup> Ar | <sup>37</sup> Cl* | <sup>38</sup> Ar | <sup>39</sup> K* | <sup>40</sup> Ar/ <sup>1</sup> H | <sup>35</sup> Cl/ <sup>37</sup> Cl* | <sup>36</sup> Ar/ <sup>38</sup> Ar | <sup>37</sup> Cl/ <sup>35</sup> Cl | 2SE             | 2SE‰        |
|-------|-----------------|---------------------------|-------------------|------------------|-------------------|------------------|------------------|----------------------------------|-------------------------------------|------------------------------------|------------------------------------|-----------------|-------------|
| Run1  | Halite (MSP)-1  | FsLA/266/90µm/60µmRR/10Hz | 3.16433           | 29.11325         | 1.12947           | 5.62194          | 0.88609          | 6.38801                          | 2.79779                             | 5.17851                            | 0.338945                           | 0.000050        | 0.15        |
| Run2  | Halite (MSP)-2  | FsLA/266/90µm/60µmRR/10Hz | 3.01383           | 29.50562         | 1.07323           | 5.69715          | 0.43865          | 5.41548                          | 2.80432                             | 5.17902                            | 0.338913                           | 0.000046        | 0.13        |
| Run3  | Halite (MSP)-3  | FsLA/266/90µm/60µmRR/10Hz | 2.98144           | 29.96153         | 1.05861           | 5.78450          | 0.34557          | 4.53020                          | 2.81185                             | 5.17964                            | 0.338860                           | 0.000044        | 0.13        |
| Run4  | Halite (MSP)-4  | FsLA/266/90µm/60µmRR/10Hz | 2.55746           | 30.49697         | 0.90838           | 5.88755          | 0.47083          | 4.03771                          | 2.80714                             | 5.17992                            | 0.338856                           | 0.000045        | 0.13        |
| Run5  | Halite (MSP)-5  | FsLA/266/90µm/60µmRR/10Hz | 2.77787           | 30.57994         | 0.98428           | 5.90290          | 0.45628          | 3.68124                          | 2.81886                             | 5.18050                            | 0.338892                           | 0.000041        | 0.12        |
| Run6  | Halite (MSP)-6  | FsLA/266/90µm/60µmRR/10Hz | 2.79157           | 30.61126         | 0.98828           | 5.90870          | 0.29402          | 3.53001                          | 2.82124                             | 5.18072                            | 0.338888                           | 0.000048        | 0.14        |
| Run7  | Halite (MSP)-7  | FsLA/266/90µm/60µmRR/10Hz | 2.83161           | 30.72472         | 1.00176           | 5.93020          | 0.46395          | 3.27959                          | 2.82344                             | 5.18107                            | 0.338892                           | 0.000044        | 0.13        |
| Run8  | Halite (MSP)-8  | FsLA/266/90µm/60µmRR/10Hz | 2.83764           | 30.74320         | 1.00327           | 5.93384          | 0.25885          | 3.13235                          | 2.82528                             | 5.18101                            | 0.338894                           | 0.000040        | 0.12        |
| Run9  | Halite (MSP)-9  | FsLA/266/90µm/60µmRR/10Hz | 2.60839           | 30.84238         | 0.92253           | 5.95302          | 0.41134          | 3.00788                          | 2.81989                             | 5.18097                            | 0.338842                           | 0.000061        | 0.18        |
| Run10 | Halite (MSP)-10 | FsLA/266/90µm/60µmRR/10Hz | 2.75905           | 30.91692         | 0.97495           | 5.96743          | 0.66057          | 2.89249                          | 2.82515                             | 5.18095                            | 0.338855                           | 0.000044        | 0.13        |
| Run11 | Halite (MSP)-11 | FsLA/266/90µm/60µmRR/10Hz | 2.80213           | 30.98467         | 0.98973           | 5.98055          | 0.45198          | 2.77456                          | 2.82864                             | 5.18091                            | 0.338900                           | 0.000044        | 0.13        |
| Run12 | Halite (MSP)-12 | FsLA/266/90µm/60µmRR/10Hz | 2.81918           | 30.95933         | 0.99551           | 5.97568          | 0.32190          | 2.70811                          | 2.82975                             | 5.18089                            | 0.338913                           | 0.000031        | 0.09        |
| Run13 | Halite (MSP)-13 | FsLA/266/90µm/60µmRR/10Hz | 2.75061           | 30.95927         | 0.97128           | 5.97573          | 0.31434          | 2.67036                          | 2.82960                             | 5.18084                            | 0.338889                           | 0.000032        | 0.09        |
| Run14 | Halite (MSP)-14 | FsLA/266/90µm/60µmRR/10Hz | 2.64747           | 30.93518         | 0.93559           | 5.97126          | 1.05314          | 2.73560                          | 2.82535                             | 5.18068                            | 0.338900                           | 0.000046        | 0.14        |
| Run15 | Halite (MSP)-15 | FsLA/266/90µm/60µmRR/10Hz | 2.77917           | 30.91214         | 0.98124           | 5.96677          | 0.42234          | 2.60908                          | 2.82927                             | 5.18072                            | 0.338904                           | 0.000040        | 0.12        |
|       |                 |                           |                   |                  |                   |                  |                  |                                  | <b>2SD</b>                          |                                    | <b>0.338891</b>                    | <b>0.000037</b> | <b>0.11</b> |
| Run16 | Halite (DS)-1   | FsLA/266/90µm/60µmRR/10Hz | 3.00466           | 30.83440         | 1.05985           | 5.95180          | 0.05063          | 2.52586                          | 2.83323                             | 5.18069                            | 0.338865                           | 0.000038        | 0.11        |
| Run17 | Halite (DS)-2   | FsLA/266/90µm/60µmRR/10Hz | 2.96276           | 30.91053         | 1.04504           | 5.96645          | 0.04095          | 2.49826                          | 2.83360                             | 5.18073                            | 0.338858                           | 0.000029        | 0.09        |
| Run18 | Halite (DS)-3   | FsLA/266/90µm/60µmRR/10Hz | 3.05405           | 30.88674         | 1.07702           | 5.96210          | 0.03633          | 2.48154                          | 2.83406                             | 5.18052                            | 0.338874                           | 0.000031        | 0.09        |
| Run19 | Halite (DS)-4   | FsLA/266/90µm/60µmRR/10Hz | 3.03628           | 31.00599         | 1.07059           | 5.98490          | 0.04787          | 2.43812                          | 2.83440                             | 5.18071                            | 0.338840                           | 0.000042        | 0.12        |
| Run20 | Halite (DS)-5   | FsLA/266/90µm/60µmRR/10Hz | 3.05438           | 30.89918         | 1.07675           | 5.96431          | 0.05441          | 2.39294                          | 2.83501                             | 5.18069                            | 0.338832                           | 0.000049        | 0.15        |
| Run21 | Halite (DS)-6   | FsLA/266/90µm/60µmRR/10Hz | 2.98827           | 30.98823         | 1.05351           | 5.98143          | 0.05239          | 2.34780                          | 2.83490                             | 5.18075                            | 0.338831                           | 0.000052        | 0.15        |
| Run22 | Halite (DS)-7   | FsLA/266/90µm/60µmRR/10Hz | 2.90521           | 30.88295         | 1.02455           | 5.96179          | 0.04193          | 2.54452                          | 2.83388                             | 5.18015                            | 0.338819                           | 0.000051        | 0.15        |
| Run23 | Halite (DS)-8   | FsLA/266/90µm/60µmRR/10Hz | 3.04475           | 30.93809         | 1.07422           | 5.97306          | 0.05863          | 2.71829                          | 2.83254                             | 5.17962                            | 0.338784                           | 0.000044        | 0.13        |
| Run24 | Halite (DS)-9   | FsLA/266/90µm/60µmRR/10Hz | 3.13719           | 30.90657         | 1.10690           | 5.96742          | 0.05109          | 2.73010                          | 2.83272                             | 5.17923                            | 0.338764                           | 0.000049        | 0.15        |
| Run25 | Halite (DS)-10  | FsLA/266/90µm/60µmRR/10Hz | 3.18609           | 30.94981         | 1.12400           | 5.97601          | 0.05238          | 2.72807                          | 2.83266                             | 5.17902                            | 0.338749                           | 0.000039        | 0.11        |
| Run27 | Halite (MSP)-16 | FsLA/266/90µm/60µmRR/10Hz | 3.17609           | 30.91302         | 1.12070           | 5.96946          | 0.34578          | 2.73363                          | 2.83167                             | 5.17853                            | 0.338780                           | 0.000028        | 0.08        |
| Run28 | Halite (MSP)-17 | FsLA/266/90µm/60µmRR/10Hz | 3.17691           | 30.93035         | 1.12097           | 5.97301          | 0.46721          | 2.72812                          | 2.83139                             | 5.17836                            | 0.338771                           | 0.000030        | 0.09        |

Note: MSP: Modern saltpan; DS: Dead Sea halite; 2SD: 2-standard deviation; SE: standard error (n = 20); \*: signal intensity and isotope ratios from samples.

Samples with italics are co-ablation of fluid inclusions and excluded from 2SD calculation.

**Electronic supplementary information (ESI) Data Table 3: Analytical results of the Dead Sea and the Salt pan halite samples.**

| Run   | Sample ID       | Remarks                   | <sup>35</sup> Cl* | <sup>36</sup> Ar | <sup>37</sup> Cl* | <sup>38</sup> Ar | <sup>39</sup> K* | <sup>40</sup> Ar/ <sup>1</sup> H | <sup>35</sup> Cl/ <sup>37</sup> Cl* | <sup>36</sup> Ar/ <sup>38</sup> Ar | <sup>37</sup> Cl/ <sup>35</sup> Cl | 2SE      | 2SE‰ |
|-------|-----------------|---------------------------|-------------------|------------------|-------------------|------------------|------------------|----------------------------------|-------------------------------------|------------------------------------|------------------------------------|----------|------|
| Run1  | Halite (MSP)-1  | FsLA/266/90µm/60µmRR/10Hz | 2.17396           | 29.01279         | 0.77510           | 5.59658          | 0.45443          | 4.18295                          | 2.79080                             | 5.18402                            | 0.339196                           | 0.000048 | 0.14 |
| Run2  | Halite (DS)-1   | FsLA/266/90µm/60µmRR/10Hz | 3.05768           | 29.18392         | 1.08240           | 5.62941          | 0.06932          | 3.62440                          | 2.82312                             | 5.18420                            | 0.339180                           | 0.000022 | 0.07 |
| Run3  | Halite (MSP)-2  | FsLA/266/90µm/60µmRR/10Hz | 2.40631           | 29.37636         | 0.85318           | 5.66657          | 0.35153          | 3.32675                          | 2.81034                             | 5.18416                            | 0.339137                           | 0.000049 | 0.15 |
| Run4  | Halite (DS)-2   | FsLA/266/90µm/60µmRR/10Hz | 3.13046           | 29.46393         | 1.10602           | 5.68338          | 0.06391          | 3.10576                          | 2.82877                             | 5.18423                            | 0.339158                           | 0.000021 | 0.06 |
| Run5  | Halite (MSP)-3  | FsLA/266/90µm/60µmRR/10Hz | 2.39161           | 29.58195         | 0.84672           | 5.70628          | 0.43277          | 2.96020                          | 2.81656                             | 5.18411                            | 0.339119                           | 0.000039 | 0.12 |
| Run6  | Halite (DS)-3   | FsLA/266/90µm/60µmRR/10Hz | 2.89117           | 29.59736         | 1.02126           | 5.70929          | 0.06616          | 2.85983                          | 2.82684                             | 5.18407                            | 0.339105                           | 0.000040 | 0.12 |
| Run7  | Halite (DS)-4   | FsLA/266/90µm/60µmRR/10Hz | 3.09041           | 29.58530         | 1.09085           | 5.70722          | 0.04552          | 2.78353                          | 2.83146                             | 5.18384                            | 0.339123                           | 0.000022 | 0.07 |
| Run8  | Halite (MSP)-4  | FsLA/266/90µm/60µmRR/10Hz | 1.95052           | 29.66073         | 0.69141           | 5.72201          | 0.57049          | 2.76150                          | 2.81062                             | 5.18362                            | 0.339030                           | 0.000039 | 0.12 |
| Run9  | Halite (DS)-5   | FsLA/266/90µm/60µmRR/10Hz | 3.04390           | 29.66917         | 1.07437           | 5.72401          | 0.07344          | 2.73323                          | 2.83143                             | 5.18329                            | 0.339081                           | 0.000026 | 0.08 |
| Run10 | Halite (MSP)-6  | FsLA/266/90µm/60µmRR/10Hz | 2.62943           | 29.80229         | 0.92906           | 5.74968          | 0.77683          | 2.69843                          | 2.82338                             | 5.18330                            | 0.339061                           | 0.000046 | 0.14 |
| Run11 | Halite (DS)-6   | FsLA/266/90µm/60µmRR/10Hz | 3.20327           | 29.85574         | 1.12978           | 5.75993          | 0.07599          | 2.63279                          | 2.83382                             | 5.18335                            | 0.339031                           | 0.000029 | 0.08 |
| Run12 | Halite (MSP)-7  | FsLA/266/90µm/60µmRR/10Hz | 3.11576           | 29.94030         | 1.09914           | 5.77652          | 0.69788          | 2.60652                          | 2.83224                             | 5.18311                            | 0.339068                           | 0.000028 | 0.08 |
| Run13 | Halite (DS)-7   | FsLA/266/90µm/60µmRR/10Hz | 3.08561           | 29.90995         | 1.08842           | 5.77088          | 0.06426          | 2.58555                          | 2.83312                             | 5.18291                            | 0.339017                           | 0.000022 | 0.06 |
| Run14 | Halite (MSP)-8  | FsLA/266/90µm/60µmRR/10Hz | 3.11576           | 29.94030         | 1.09914           | 5.77652          | 0.69788          | 2.60652                          | 2.83224                             | 5.18311                            | 0.339068                           | 0.000028 | 0.08 |
| Run15 | Halite (DS)-8   | FsLA/266/90µm/60µmRR/10Hz | 3.24120           | 30.09945         | 1.14284           | 5.80758          | 0.21537          | 2.56764                          | 2.83367                             | 5.18279                            | 0.339003                           | 0.000028 | 0.08 |
| Run16 | Halite (MSP)-9  | FsLA/266/90µm/60µmRR/10Hz | 2.82642           | 30.22288         | 0.99761           | 5.83154          | 0.58017          | 2.55879                          | 2.82875                             | 5.18266                            | 0.339008                           | 0.000038 | 0.11 |
| Run17 | Halite (DS)-9   | FsLA/266/90µm/60µmRR/10Hz | 3.23183           | 30.15413         | 1.13945           | 5.81849          | 0.05082          | 2.53461                          | 2.83464                             | 5.18247                            | 0.338990                           | 0.000031 | 0.09 |
| Run18 | Halite (MSP)-10 | FsLA/266/90µm/60µmRR/10Hz | 2.84685           | 30.21642         | 1.00473           | 5.83061          | 0.36500          | 2.54331                          | 2.82849                             | 5.18238                            | 0.339009                           | 0.000042 | 0.12 |
| Run19 | Halite (DS)-10  | FsLA/266/90µm/60µmRR/10Hz | 3.17212           | 30.17985         | 1.11859           | 5.82368          | 0.04362          | 2.53567                          | 2.83407                             | 5.18227                            | 0.338997                           | 0.000021 | 0.06 |
| Run20 | Halite (MSP)-11 | FsLA/266/90µm/60µmRR/10Hz | 2.59544           | 30.24700         | 0.91661           | 5.83667          | 0.71126          | 2.53792                          | 2.82493                             | 5.18224                            | 0.338992                           | 0.000048 | 0.14 |
| Run21 | Halite (DS)-11  | FsLA/266/90µm/60µmRR/10Hz | 3.31083           | 30.14309         | 1.16706           | 5.81672          | 0.06700          | 2.51969                          | 2.83557                             | 5.18215                            | 0.338981                           | 0.000023 | 0.07 |
| Run22 | Halite (MSP)-12 | FsLA/266/90µm/60µmRR/10Hz | 2.82152           | 30.31572         | 0.99586           | 5.85026          | 0.78609          | 2.56123                          | 2.82913                             | 5.18195                            | 0.338999                           | 0.000032 | 0.09 |
| Run23 | Halite (DS)-12  | FsLA/266/90µm/60µmRR/10Hz | 3.25925           | 30.13974         | 1.14910           | 5.81610          | 0.05550          | 2.54307                          | 2.83483                             | 5.18213                            | 0.338998                           | 0.000023 | 0.07 |
| Run24 | Halite (MSP)-13 | FsLA/266/90µm/60µmRR/10Hz | 2.75451           | 30.18394         | 0.97243           | 5.82478          | 0.36654          | 2.55944                          | 2.82915                             | 5.18200                            | 0.339008                           | 0.000032 | 0.10 |
| Run25 | Halite (DS)-13  | FsLA/266/90µm/60µmRR/10Hz | 3.27127           | 30.05115         | 1.15334           | 5.79927          | 0.06720          | 2.56090                          | 2.83470                             | 5.18189                            | 0.338980                           | 0.000020 | 0.06 |
| Run26 | Halite (MSP)-14 | FsLA/266/90µm/60µmRR/10Hz | 2.70525           | 30.04689         | 0.95527           | 5.79856          | 0.67313          | 2.59445                          | 2.82721                             | 5.18179                            | 0.338995                           | 0.000046 | 0.14 |
| Run27 | Halite (DS)-14  | FsLA/266/90µm/60µmRR/10Hz | 3.31879           | 30.02012         | 1.17010           | 5.79343          | 0.06435          | 2.59599                          | 2.83506                             | 5.18176                            | 0.338969                           | 0.000020 | 0.06 |
| Run28 | Halite (MSP)-15 | FsLA/266/90µm/60µmRR/10Hz | 2.70525           | 30.04689         | 0.95527           | 5.79856          | 0.67313          | 2.59445                          | 2.82721                             | 5.18179                            | 0.338995                           | 0.000046 | 0.14 |

Note: MSP: Modern saltpan; DS: Dead Sea halite; SE: standard error (n = 20); \*: signal intensity and isotope ratios from samples.

**Electronic supplementary information (ESI) Data Table 4:** Analytical results of the Mediterranean halites the IAPSO AgCl samples by the Dead Sea halite

| Run   | Sample ID  | Remarks                   | <sup>35</sup> Cl* | <sup>36</sup> Ar | <sup>37</sup> Cl* | <sup>38</sup> Ar | <sup>39</sup> K* | <sup>40</sup> Ar <sup>1</sup> H | <sup>35</sup> Cl/ <sup>37</sup> Cl* | <sup>36</sup> Ar/ <sup>38</sup> Ar | <sup>37</sup> Cl/ <sup>35</sup> Cl | 2SE      | 2SE‰ |
|-------|------------|---------------------------|-------------------|------------------|-------------------|------------------|------------------|---------------------------------|-------------------------------------|------------------------------------|------------------------------------|----------|------|
| Run1  | DeadSea-1  | FsLA/266/90um/60umRR/10Hz | 2.73207           | 28.44381         | 0.97082           | 5.49664          | 0.04400          | 4.44510                         | 2.81189                             | 5.17477                            | 0.338595                           | 0.000035 | 0.10 |
| Run2  | MH1-1      | FsLA/266/90um/60umRR/10Hz | 2.58745           | 28.54140         | 0.91975           | 5.51572          | 1.66902          | 4.31985                         | 2.80942                             | 5.17456                            | 0.338599                           | 0.000041 | 0.12 |
| Run3  | DeadSea-2  | FsLA/266/90um/60umRR/10Hz | 2.63101           | 28.71087         | 0.93446           | 5.54859          | 0.04749          | 4.19072                         | 2.81261                             | 5.17444                            | 0.338554                           | 0.000031 | 0.09 |
| Run4  | MH1-2      | FsLA/266/90um/60umRR/10Hz | 2.65164           | 28.78608         | 0.94164           | 5.56330          | 0.01975          | 4.09115                         | 2.81310                             | 5.17429                            | 0.338651                           | 0.000026 | 0.08 |
| Run5  | DeadSea-3  | FsLA/266/90um/60umRR/10Hz | 2.71164           | 28.87364         | 0.96217           | 5.58033          | 0.03111          | 4.00441                         | 2.81535                             | 5.17419                            | 0.338567                           | 0.000032 | 0.09 |
| Run6  | MH1-3      | FsLA/266/90um/60umRR/10Hz | 2.75975           | 28.98451         | 0.97903           | 5.60170          | 0.03181          | 3.92809                         | 2.81573                             | 5.17424                            | 0.338639                           | 0.000028 | 0.08 |
| Run7  | DeadSea-4  | FsLA/266/90um/60umRR/10Hz | 2.70541           | 29.04093         | 0.95962           | 5.61265          | 0.03733          | 3.87158                         | 2.81634                             | 5.17419                            | 0.338570                           | 0.000029 | 0.09 |
| Run8  | MH1-4      | FsLA/266/90um/60umRR/10Hz | 2.65407           | 29.05540         | 0.94161           | 5.61543          | 0.04565          | 3.81363                         | 2.81516                             | 5.17421                            | 0.338634                           | 0.000031 | 0.09 |
| Run9  | DeadSea-5  | FsLA/266/90um/60umRR/10Hz | 2.19913           | 28.98449         | 0.78184           | 5.60179          | 0.02790          | 3.76469                         | 2.80654                             | 5.17415                            | 0.338503                           | 0.000062 | 0.18 |
| Run10 | MH1-5      | FsLA/266/90um/60umRR/10Hz | 2.61847           | 28.90127         | 0.92882           | 5.58580          | 0.04796          | 3.70236                         | 2.81570                             | 5.17406                            | 0.338621                           | 0.000040 | 0.12 |
| Run11 | DeadSea-6  | FsLA/266/90um/60umRR/10Hz | 2.90102           | 28.90145         | 1.02753           | 5.58600          | 0.04023          | 3.64683                         | 2.82128                             | 5.17391                            | 0.338597                           | 0.000026 | 0.08 |
| Run12 | MH2-1      | FsLA/266/90um/60umRR/10Hz | 2.69925           | 28.90585         | 0.95651           | 5.58667          | 0.20824          | 3.60873                         | 2.81908                             | 5.17407                            | 0.338522                           | 0.000031 | 0.09 |
| Run13 | DeadSea-7  | FsLA/266/90um/60umRR/10Hz | 2.68154           | 28.99312         | 0.95059           | 5.60342          | 0.03837          | 3.61681                         | 2.81808                             | 5.17418                            | 0.338606                           | 0.000031 | 0.09 |
| Run14 | MH2-2      | FsLA/266/90um/60umRR/10Hz | 2.82194           | 29.03153         | 0.99948           | 5.61087          | 0.07380          | 3.59602                         | 2.82109                             | 5.17416                            | 0.338544                           | 0.000036 | 0.11 |
| Run15 | DeadSea-8  | FsLA/266/90um/60umRR/10Hz | 2.70033           | 29.03360         | 0.95705           | 5.61138          | 0.03936          | 3.60163                         | 2.81906                             | 5.17406                            | 0.338603                           | 0.000036 | 0.11 |
| Run16 | MH2-3      | FsLA/266/90um/60umRR/10Hz | 2.78349           | 29.00082         | 0.98606           | 5.60505          | 0.14450          | 3.59440                         | 2.82003                             | 5.17405                            | 0.338535                           | 0.000028 | 0.08 |
| Run17 | DeadSea-9  | FsLA/266/90um/60umRR/10Hz | 2.63440           | 29.06036         | 0.93382           | 5.61633          | 0.06582          | 3.56325                         | 2.81758                             | 5.17427                            | 0.338580                           | 0.000033 | 0.10 |
| Run18 | MH2-4      | FsLA/266/90um/60umRR/10Hz | 2.73717           | 29.06827         | 0.96948           | 5.61791          | 0.38532          | 3.52329                         | 2.82053                             | 5.17422                            | 0.338515                           | 0.000028 | 0.08 |
| Run19 | DeadSea-10 | FsLA/266/90um/60umRR/10Hz | 2.59270           | 28.85514         | 0.91924           | 5.57736          | 0.04516          | 3.54000                         | 2.81786                             | 5.17363                            | 0.338594                           | 0.000036 | 0.11 |
| Run20 | MH2-5      | FsLA/266/90um/60umRR/10Hz | 2.63498           | 28.84343         | 0.93383           | 5.57548          | 0.55168          | 3.53596                         | 2.81695                             | 5.17327                            | 0.338491                           | 0.000039 | 0.12 |
| Run21 | DeadSea-11 | FsLA/266/90um/60umRR/10Hz | 2.76063           | 28.84432         | 0.97811           | 5.57574          | 0.03357          | 3.52556                         | 2.82006                             | 5.17319                            | 0.338592                           | 0.000028 | 0.08 |
| Run22 | IAPSO-1    | FsLA/266/90um/60umRR/10Hz | 1.06834           | 28.96953         | 0.38539           | 5.60069          | 0.03255          | 3.61263                         | 2.77049                             | 5.17250                            | 0.338559                           | 0.000046 | 0.14 |
| Run23 | DeadSea-12 | FsLA/266/90um/60umRR/10Hz | 2.75929           | 28.93286         | 0.97767           | 5.59332          | 0.04327          | 3.53758                         | 2.81991                             | 5.17275                            | 0.338561                           | 0.000027 | 0.08 |
| Run24 | IAPSO-2    | FsLA/266/90um/60umRR/10Hz | 1.04725           | 28.99603         | 0.37796           | 5.60586          | 0.03174          | 3.59922                         | 2.76883                             | 5.17245                            | 0.338545                           | 0.000050 | 0.15 |
| Run25 | DeadSea-13 | FsLA/266/90um/60umRR/10Hz | 2.64549           | 28.83788         | 0.93776           | 5.57489          | 0.05882          | 3.54773                         | 2.81756                             | 5.17282                            | 0.338572                           | 0.000034 | 0.10 |
| Run26 | IAPSO-3    | FsLA/266/90um/60umRR/10Hz | 1.04990           | 28.83665         | 0.37890           | 5.57507          | 0.03312          | 3.63882                         | 2.76804                             | 5.17243                            | 0.338528                           | 0.000062 | 0.18 |
| Run27 | DeadSea-14 | FsLA/266/90um/60umRR/10Hz | 2.65394           | 28.84983         | 0.94103           | 5.57761          | 0.04427          | 3.61448                         | 2.81742                             | 5.17244                            | 0.338583                           | 0.000030 | 0.09 |
| Run28 | IAPSO-4    | FsLA/266/90um/60umRR/10Hz | 1.08510           | 28.92366         | 0.39148           | 5.59251          | 0.03373          | 3.69339                         | 2.76971                             | 5.17186                            | 0.338538                           | 0.000048 | 0.14 |
| Run29 | DeadSea-15 | FsLA/266/90um/60umRR/10Hz | 2.76149           | 28.87349         | 0.97888           | 5.58242          | 0.06090          | 3.65649                         | 2.81854                             | 5.17222                            | 0.338570                           | 0.000031 | 0.09 |
| Run30 | IAPSO-5    | FsLA/266/90um/60umRR/10Hz | 1.06607           | 29.00466         | 0.38492           | 5.60820          | 0.03400          | 3.73406                         | 2.76684                             | 5.17183                            | 0.338520                           | 0.000055 | 0.16 |
| Run31 | DeadSea-16 | FsLA/266/90um/60umRR/10Hz | 2.66652           | 28.77822         | 0.94566           | 5.56388          | 0.04983          | 3.70108                         | 2.81629                             | 5.17233                            | 0.338575                           | 0.000039 | 0.11 |

Note: IAPSO: Standard ocean water AgCl; MH1 and MH2: Mediterranean halite samples; SE: standard error (n = 20); \*: signal intensity and isotope ratios from samples.

**Electronic supplementary information (ESI) Data Table 5:** Analytical results of the Cica chemical reagent and the IAPSO AgCl samples.

| Run   | Sample ID | Remarks                   | <sup>35</sup> Cl* | <sup>36</sup> Ar | <sup>37</sup> Cl* | <sup>38</sup> Ar | <sup>39</sup> K* | <sup>40</sup> Ar <sup>1</sup> H | <sup>35</sup> Cl/ <sup>37</sup> Cl* | <sup>36</sup> Ar/ <sup>38</sup> Ar | <sup>37</sup> Cl/ <sup>35</sup> Cl | 2SE      | 2SE‰ |
|-------|-----------|---------------------------|-------------------|------------------|-------------------|------------------|------------------|---------------------------------|-------------------------------------|------------------------------------|------------------------------------|----------|------|
| Run1  | Cica-0    | FsLA/266/90µm/60µmRR/10Hz | 1.14789           | 30.88488         | 0.40982           | 5.95542          | 0.00263          | 2.56481                         | 2.80082                             | 5.18601                            | 0.339251                           | 0.000036 | 0.11 |
| Run2  | IAPSO-1   | FsLA/266/90µm/60µmRR/10Hz | 1.05530           | 31.07796         | 0.37694           | 5.99318          | 0.03352          | 2.40139                         | 2.79863                             | 5.18556                            | 0.339137                           | 0.000036 | 0.11 |
| Run3  | Cica-1    | FsLA/266/90µm/60µmRR/10Hz | 1.11947           | 31.22415         | 0.39956           | 6.02176          | 0.00254          | 2.39531                         | 2.80165                             | 5.18522                            | 0.339205                           | 0.000025 | 0.07 |
| Run4  | IAPSO-2   | FsLA/266/90µm/60µmRR/10Hz | 1.06918           | 31.33371         | 0.38120           | 6.04327          | 0.03217          | 2.24307                         | 2.80341                             | 5.18489                            | 0.339106                           | 0.000040 | 0.12 |
| Run5  | Cica-2    | FsLA/266/90µm/60µmRR/10Hz | 1.06008           | 31.42657         | 0.37814           | 6.06135          | 0.00236          | 2.21867                         | 2.80323                             | 5.18475                            | 0.339165                           | 0.000031 | 0.09 |
| Run6  | IAPSO-3   | FsLA/266/90µm/60µmRR/10Hz | 1.05865           | 31.59782         | 0.37720           | 6.09488          | 0.03402          | 2.15159                         | 2.80566                             | 5.18432                            | 0.339073                           | 0.000039 | 0.12 |
| Run7  | Cica-3    | FsLA/266/90µm/60µmRR/10Hz | 1.06948           | 31.66039         | 0.38139           | 6.10735          | 0.00237          | 2.17542                         | 2.80393                             | 5.18398                            | 0.339146                           | 0.000026 | 0.08 |
| Run8  | IAPSO-4   | FsLA/266/90µm/60µmRR/10Hz | 1.02634           | 31.62457         | 0.36574           | 6.10130          | 0.03132          | 2.66218                         | 2.80501                             | 5.18326                            | 0.339039                           | 0.000043 | 0.13 |
| Run9  | Cica-4    | FsLA/266/90µm/60µmRR/10Hz | 1.06014           | 31.83590         | 0.37874           | 6.14200          | 0.00317          | 2.40627                         | 2.79889                             | 5.18332                            | 0.339053                           | 0.000032 | 0.09 |
| Run10 | IAPSO-5   | FsLA/266/90µm/60µmRR/10Hz | 1.01379           | 31.86004         | 0.36236           | 6.14695          | 0.03045          | 2.35429                         | 2.79655                             | 5.18306                            | 0.339003                           | 0.000036 | 0.11 |
| Run11 | Cica-5    | FsLA/266/90µm/60µmRR/10Hz | 1.05464           | 31.92503         | 0.37618           | 6.15979          | 0.00239          | 2.21253                         | 2.80335                             | 5.18282                            | 0.339075                           | 0.000025 | 0.07 |
| Run12 | IAPSO-6   | FsLA/266/90µm/60µmRR/10Hz | 1.06423           | 31.98173         | 0.37922           | 6.17095          | 0.03173          | 2.16020                         | 2.80527                             | 5.18263                            | 0.338995                           | 0.000042 | 0.12 |
| Run13 | Cica-6    | FsLA/266/90µm/60µmRR/10Hz | 1.04700           | 31.97585         | 0.37346           | 6.17004          | 0.00243          | 2.15611                         | 2.80332                             | 5.18244                            | 0.339073                           | 0.000025 | 0.07 |
| Run14 | IAPSO-7   | FsLA/266/90µm/60µmRR/10Hz | 1.03191           | 32.07786         | 0.36769           | 6.18972          | 0.03176          | 2.05561                         | 2.80554                             | 5.18245                            | 0.339001                           | 0.000033 | 0.10 |
| Run15 | Cica-7    | FsLA/266/90µm/60µmRR/10Hz | 1.06579           | 32.08969         | 0.37942           | 6.19223          | 0.00220          | 2.06158                         | 2.80878                             | 5.18225                            | 0.339070                           | 0.000035 | 0.10 |
| Run16 | IAPSO-8   | FsLA/266/90µm/60µmRR/10Hz | 1.07806           | 32.09492         | 0.38369           | 6.19333          | 0.03273          | 2.00588                         | 2.80892                             | 5.18218                            | 0.339000                           | 0.000040 | 0.12 |
| Run17 | Cica-8    | FsLA/266/90µm/60µmRR/10Hz | 1.10084           | 32.20447         | 0.39157           | 6.21476          | 0.00220          | 1.95515                         | 2.81112                             | 5.18193                            | 0.339054                           | 0.000032 | 0.10 |
| Run18 | IAPSO-9   | FsLA/266/90µm/60µmRR/10Hz | 1.05098           | 32.18149         | 0.37419           | 6.21044          | 0.03103          | 1.99570                         | 2.80795                             | 5.18184                            | 0.338973                           | 0.000033 | 0.10 |
| Run19 | Cica-9    | FsLA/266/90µm/60µmRR/10Hz | 1.13202           | 32.27775         | 0.40242           | 6.22928          | 0.00217          | 1.92247                         | 2.81285                             | 5.18162                            | 0.339047                           | 0.000029 | 0.08 |
| Run20 | IAPSO-10  | FsLA/266/90µm/60µmRR/10Hz | 1.03273           | 32.35589         | 0.36744           | 6.24434          | 0.03117          | 1.89118                         | 2.80992                             | 5.18164                            | 0.338987                           | 0.000034 | 0.10 |
| Run21 | Cica-10   | FsLA/266/90µm/60µmRR/10Hz | 1.12694           | 32.36850         | 0.40073           | 6.24674          | 0.00223          | 1.91497                         | 2.81210                             | 5.18167                            | 0.339056                           | 0.000024 | 0.07 |
| Run22 | IAPSO-11  | FsLA/266/90µm/60µmRR/10Hz | 1.04560           | 32.41244         | 0.37183           | 6.25539          | 0.03075          | 1.84879                         | 2.81117                             | 5.18152                            | 0.338976                           | 0.000029 | 0.09 |
| Run23 | Cica-11   | FsLA/266/90µm/60µmRR/10Hz | 1.15325           | 32.40006         | 0.40975           | 6.25325          | 0.00219          | 1.89936                         | 2.81436                             | 5.18132                            | 0.339062                           | 0.000021 | 0.06 |
| Run24 | IAPSO-12  | FsLA/266/90µm/60µmRR/10Hz | 1.07520           | 32.45062         | 0.38219           | 6.26298          | 0.03162          | 1.82707                         | 2.81263                             | 5.18134                            | 0.338977                           | 0.000034 | 0.10 |
| Run25 | Cica-12   | FsLA/266/90µm/60µmRR/10Hz | 1.15982           | 32.43090         | 0.41191           | 6.25946          | 0.00216          | 1.86718                         | 2.81558                             | 5.18110                            | 0.339069                           | 0.000032 | 0.10 |
| Run26 | IAPSO-13  | FsLA/266/90µm/60µmRR/10Hz | 1.10786           | 32.47020         | 0.39350           | 6.26704          | 0.03306          | 1.79743                         | 2.81488                             | 5.18111                            | 0.338976                           | 0.000039 | 0.12 |

Note: IAPSO: Standard ocean water AgCl; Cica: Cica Chemical reagent AgCl; SE: standard error (n = 20); \*: signal intensity and isotope ratios from samples.

**Electronic supplementary information (ESI) Data Table 6:** Analytical results of the JB-1a and the IAPSO AgCl samples.

| Run   | Sample ID | Remarks                   | <sup>35</sup> Cl* | <sup>36</sup> Ar | <sup>37</sup> Cl* | <sup>38</sup> Ar | <sup>39</sup> K* | <sup>40</sup> Ar <sup>1</sup> H | <sup>35</sup> Cl/ <sup>37</sup> Cl* | <sup>36</sup> Ar/ <sup>38</sup> Ar | <sup>37</sup> Cl/ <sup>35</sup> Cl | 2SE      | 2SE‰ |
|-------|-----------|---------------------------|-------------------|------------------|-------------------|------------------|------------------|---------------------------------|-------------------------------------|------------------------------------|------------------------------------|----------|------|
| Run1  | IAPSO-1   | FsLA/266/90um/60umRR/10Hz | 1.01558           | 42.97213         | 0.36164           | 8.24534          | 0.02671          | 2.50021                         | 2.80738                             | 5.21171                            | 0.339557                           | 0.000040 | 0.12 |
| Run2  | JB-1a-3-1 | FsLA/266/90um/60umRR/10Hz | 0.89162           | 43.03909         | 0.31789           | 8.25977          | 0.00272          | 2.37286                         | 2.79071                             | 5.21071                            | 0.339059                           | 0.000053 | 0.16 |
| Run3  | IAPSO-2   | FsLA/266/90um/60umRR/10Hz | 1.04730           | 44.22800         | 0.37321           | 8.49098          | 0.02751          | 2.61520                         | 2.80500                             | 5.20886                            | 0.339460                           | 0.000035 | 0.10 |
| Run4  | JB-1a-3-2 | FsLA/266/90um/60umRR/10Hz | 0.88536           | 45.04916         | 0.31660           | 8.65137          | 0.00293          | 2.67975                         | 2.78227                             | 5.20719                            | 0.338936                           | 0.000049 | 0.15 |
| Run5  | IAPSO-3   | FsLA/266/90um/60umRR/10Hz | 1.21555           | 45.82823         | 0.43223           | 8.80318          | 0.03429          | 2.72225                         | 2.81146                             | 5.20590                            | 0.339308                           | 0.000030 | 0.09 |
| Run6  | JB-1a-3-3 | FsLA/266/90um/60umRR/10Hz | 1.04898           | 46.47223         | 0.37398           | 8.92918          | 0.00298          | 2.77523                         | 2.79232                             | 5.20456                            | 0.338872                           | 0.000042 | 0.13 |
| Run7  | IAPSO-4   | FsLA/266/90um/60umRR/10Hz | 1.26221           | 47.32822         | 0.44883           | 9.09608          | 0.03446          | 2.83024                         | 2.81126                             | 5.20318                            | 0.339202                           | 0.000027 | 0.08 |
| Run8  | JB-1a-4-1 | FsLA/266/90um/60umRR/10Hz | 1.40935           | 47.85149         | 0.50008           | 9.19941          | 0.00385          | 2.87789                         | 2.81505                             | 5.20161                            | 0.338869                           | 0.000031 | 0.09 |
| Run9  | IAPSO-5   | FsLA/266/90um/60umRR/10Hz | 1.38022           | 48.74553         | 0.49043           | 9.37383          | 0.03541          | 2.93174                         | 2.81355                             | 5.20021                            | 0.339094                           | 0.000040 | 0.12 |
| Run14 | IAPSO-8   | FsLA/266/90um/60umRR/10Hz | 1.17380           | 46.55539         | 0.41721           | 8.94669          | 0.03027          | 2.55782                         | 2.81205                             | 5.20367                            | 0.339206                           | 0.000028 | 0.08 |
| Run15 | JB-1a-4-4 | FsLA/266/90um/60umRR/10Hz | 1.11084           | 46.81984         | 0.39504           | 8.99965          | 0.00385          | 2.58208                         | 2.80672                             | 5.20243                            | 0.338879                           | 0.000047 | 0.14 |
| Run16 | IAPSO-9   | FsLA/266/90um/60umRR/10Hz | 1.23650           | 47.30603         | 0.43932           | 9.09464          | 0.03258          | 2.60172                         | 2.81385                             | 5.20156                            | 0.339163                           | 0.000025 | 0.07 |
| Run17 | JB-1a-4-5 | FsLA/266/90um/60umRR/10Hz | 0.86729           | 49.56033         | 0.31046           | 9.53775          | 0.96591          | 2.74931                         | 2.78740                             | 5.19634                            | 0.338838                           | 0.000058 | 0.17 |
| Run18 | IAPSO-10  | FsLA/266/90um/60umRR/10Hz | 1.28221           | 49.13315         | 0.45597           | 9.45114          | 0.03280          | 2.77729                         | 2.81085                             | 5.19868                            | 0.339092                           | 0.000033 | 0.10 |
| Run5  | IAPSO-3   | FsLA/266/90um/60umRR/10Hz | 1.76983           | 37.97759         | 0.65154           | 7.41319          | 0.05954          | 10.00154                        | 2.71537                             | 5.12297                            | 0.336511                           | 0.000042 | 0.13 |
| Run6  | JB-1-21-1 | FsLA/266/90um/60umRR/10Hz | 2.40993           | 37.85505         | 0.87484           | 7.38922          | 0.01805          | 9.77833                         | 2.75389                             | 5.12301                            | 0.336242                           | 0.000061 | 0.18 |
| Run7  | IAPSO-4   | FsLA/266/90um/60umRR/10Hz | 1.76639           | 37.98919         | 0.64935           | 7.41587          | 0.05914          | 9.64216                         | 2.71838                             | 5.12268                            | 0.336472                           | 0.000038 | 0.11 |
| Run11 | JB-1-21-3 | FsLA/266/90um/60umRR/10Hz | 1.56640           | 36.91103         | 0.57614           | 7.20741          | 0.01678          | 9.00215                         | 2.71618                             | 5.12126                            | 0.336170                           | 0.000142 | 0.42 |
| Run12 | IAPSO-6   | FsLA/266/90um/60umRR/10Hz | 1.76507           | 37.20469         | 0.64689           | 7.26387          | 0.05958          | 9.00608                         | 2.72682                             | 5.12189                            | 0.336460                           | 0.000042 | 0.13 |
| Run13 | JB-1-21-4 | FsLA/266/90um/60umRR/10Hz | 2.09981           | 37.32320         | 0.76340           | 7.28639          | 0.01468          | 8.89752                         | 2.74964                             | 5.12232                            | 0.336192                           | 0.000064 | 0.19 |
| Run14 | IAPSO-7   | FsLA/266/90um/60umRR/10Hz | 1.86345           | 37.65852         | 0.68102           | 7.35127          | 0.06479          | 8.86990                         | 2.73468                             | 5.12273                            | 0.336505                           | 0.000045 | 0.13 |

Note: IAPSO: Standard ocean water AgCl; SE: standard error (n = 20); \*: signal intensity and isotope ratios from samples.

**Electronic supplementary information (ESI) Data Table 7: Analytical results of the JB-3 and the IAPSO AgCl samples.**

| Run   | Sample ID | Remarks                   | <sup>35</sup> Cl* | <sup>36</sup> Ar | <sup>37</sup> Cl* | <sup>38</sup> Ar | <sup>39</sup> K* | <sup>40</sup> Ar <sup>1</sup> H | <sup>35</sup> Cl/ <sup>37</sup> Cl* | <sup>36</sup> Ar/ <sup>38</sup> Ar | <sup>37</sup> Cl/ <sup>35</sup> Cl | 2SE      | 2SE‰ |
|-------|-----------|---------------------------|-------------------|------------------|-------------------|------------------|------------------|---------------------------------|-------------------------------------|------------------------------------|------------------------------------|----------|------|
| Run1  | IAPSSO-1  | FsLA/266/90um/60umRR/10Hz | 1.48695           | 40.21512         | 0.54722           | 7.75887          | 0.04744          | 9.62503                         | 2.71499                             | 5.18312                            | 0.337611                           | 0.000053 | 0.16 |
| Run2  | JB-3-1-1  | FsLA/266/90um/60umRR/10Hz | 2.52681           | 40.34863         | 0.90920           | 7.78336          | 0.01131          | 9.33211                         | 2.77776                             | 5.18394                            | 0.337902                           | 0.000103 | 0.30 |
| Run3  | IAPSSO-2  | FsLA/266/90um/60umRR/10Hz | 1.58576           | 40.85484         | 0.58105           | 7.88116          | 0.05131          | 9.25345                         | 2.72802                             | 5.18386                            | 0.337907                           | 0.000032 | 0.09 |
| Run4  | JB-3-1-2  | FsLA/266/90um/60umRR/10Hz | 2.34577           | 40.74637         | 0.84512           | 7.85989          | 0.01097          | 8.94691                         | 2.77444                             | 5.18409                            | 0.338048                           | 0.000092 | 0.27 |
| Run5  | IAPSSO-3  | FsLA/266/90um/60umRR/10Hz | 1.48186           | 41.18008         | 0.54400           | 7.94360          | 0.04281          | 8.90561                         | 2.72143                             | 5.18406                            | 0.337972                           | 0.000050 | 0.15 |
| Run6  | JB-3-1-3  | FsLA/266/90um/60umRR/10Hz | 2.37190           | 41.14813         | 0.85365           | 7.93735          | 0.01042          | 8.66790                         | 2.77651                             | 5.18411                            | 0.338132                           | 0.000107 | 0.32 |
| Run7  | IAPSSO-4  | FsLA/266/90um/60umRR/10Hz | 1.51182           | 41.52494         | 0.55360           | 8.01000          | 0.04390          | 8.62043                         | 2.72912                             | 5.18414                            | 0.338007                           | 0.000054 | 0.16 |
| Run8  | JB-3-2-1  | FsLA/266/90um/60umRR/10Hz | 2.19306           | 41.52073         | 0.78988           | 8.00954          | 0.01689          | 8.46294                         | 2.77610                             | 5.18391                            | 0.337806                           | 0.000064 | 0.19 |
| Run9  | IAPSSO-5  | FsLA/266/90um/60umRR/10Hz | 1.52809           | 41.90444         | 0.55864           | 8.08370          | 0.04493          | 8.39345                         | 2.73309                             | 5.18382                            | 0.337997                           | 0.000047 | 0.14 |
| Run10 | JB-3-2-2  | FsLA/266/90um/60umRR/10Hz | 2.10487           | 41.83226         | 0.75870           | 8.07016          | 0.01081          | 8.22602                         | 2.77315                             | 5.18358                            | 0.337807                           | 0.000064 | 0.19 |
| Run11 | IAPSSO-6  | FsLA/266/90um/60umRR/10Hz | 1.49739           | 42.11669         | 0.54731           | 8.12520          | 0.04444          | 8.18966                         | 2.73359                             | 5.18347                            | 0.338002                           | 0.000041 | 0.12 |
| Run12 | JB-3-2-3  | FsLA/266/90um/60umRR/10Hz | 2.15895           | 41.98671         | 0.77707           | 8.10048          | 0.01016          | 8.05183                         | 2.77773                             | 5.18324                            | 0.337810                           | 0.000066 | 0.20 |
| Run13 | IAPSSO-7  | FsLA/266/90um/60umRR/10Hz | 1.61436           | 42.33670         | 0.58769           | 8.16823          | 0.04938          | 8.01100                         | 2.74528                             | 5.18310                            | 0.338038                           | 0.000053 | 0.16 |
| Run14 | JB-3-3-1  | FsLA/266/90um/60umRR/10Hz | 1.72832           | 42.30695         | 0.62699           | 8.16260          | 0.00960          | 7.91880                         | 2.75626                             | 5.18303                            | 0.337980                           | 0.000050 | 0.15 |
| Run15 | IAPSSO-8  | FsLA/266/90um/60umRR/10Hz | 1.47239           | 42.56158         | 0.53776           | 8.21214          | 0.04355          | 7.86026                         | 2.73703                             | 5.18276                            | 0.337952                           | 0.000025 | 0.08 |
| Run16 | JB-3-3-2  | FsLA/266/90um/60umRR/10Hz | 2.11507           | 42.55993         | 0.76136           | 8.21213          | 0.00975          | 7.73134                         | 2.77599                             | 5.18257                            | 0.338013                           | 0.000107 | 0.32 |
| Run17 | IAPSSO-9  | FsLA/266/90um/60umRR/10Hz | 1.58588           | 42.89469         | 0.57695           | 8.27746          | 0.04961          | 7.72711                         | 2.74693                             | 5.18211                            | 0.337969                           | 0.000047 | 0.14 |
| Run18 | JB-3-3-3  | FsLA/266/90um/60umRR/10Hz | 2.28116           | 42.64244         | 0.81896           | 8.22865          | 0.00941          | 7.58444                         | 2.78424                             | 5.18219                            | 0.338000                           | 0.000086 | 0.25 |
| Run19 | IAPSSO-10 | FsLA/266/90um/60umRR/10Hz | 1.45531           | 42.87121         | 0.53092           | 8.27260          | 0.04239          | 7.55299                         | 2.73970                             | 5.18231                            | 0.337992                           | 0.000039 | 0.12 |
| Run20 | JB-3-1-4  | FsLA/266/90um/60umRR/10Hz | 2.47928           | 42.79205         | 0.88777           | 8.25767          | 0.00925          | 7.38918                         | 2.79134                             | 5.18210                            | 0.338185                           | 0.000118 | 0.35 |
| Run21 | IAPSSO-11 | FsLA/266/90um/60umRR/10Hz | 1.65484           | 43.00193         | 0.60000           | 8.29696          | 0.05160          | 7.35776                         | 2.75646                             | 5.18286                            | 0.338133                           | 0.000042 | 0.13 |
| Run22 | JB-3-1-5  | FsLA/266/90um/60umRR/10Hz | 2.45900           | 42.83464         | 0.88034           | 8.26468          | 0.00929          | 7.22060                         | 2.79187                             | 5.18285                            | 0.338248                           | 0.000104 | 0.31 |
| Run23 | IAPSSO-12 | FsLA/266/90um/60umRR/10Hz | 1.53466           | 43.13149         | 0.55769           | 8.32137          | 0.04553          | 7.21836                         | 2.74982                             | 5.18322                            | 0.338188                           | 0.000055 | 0.16 |
| Run24 | JB-3-1-6  | FsLA/266/90um/60umRR/10Hz | 2.64357           | 42.79206         | 0.94449           | 8.25591          | 0.01053          | 7.07419                         | 2.79773                             | 5.18320                            | 0.338328                           | 0.000097 | 0.29 |
| Run25 | IAPSSO-13 | FsLA/266/90um/60umRR/10Hz | 1.52091           | 43.13499         | 0.55248           | 8.32167          | 0.04420          | 7.10014                         | 2.75072                             | 5.18346                            | 0.338252                           | 0.000033 | 0.10 |

IAPSO: Standard ocean water AgCl; SE: standard error (n = 20); \*: signal intensity and isotope ratios from samples.

**Electronic supplementary information (ESI) Data Table 8: Outlier analytical results of the JB-1a and JB-3 and the IAPSO AgCl samples.**

| Run   | Sample ID | Remarks                   | <sup>35</sup> Cl* | <sup>36</sup> Ar | <sup>37</sup> Cl* | <sup>38</sup> Ar | <sup>39</sup> K* | <sup>40</sup> Ar <sup>1</sup> H | <sup>35</sup> Cl/ <sup>37</sup> Cl* | <sup>36</sup> Ar/ <sup>38</sup> Ar | <sup>37</sup> Cl/ <sup>35</sup> Cl | 2SE      | 2SE‰ |
|-------|-----------|---------------------------|-------------------|------------------|-------------------|------------------|------------------|---------------------------------|-------------------------------------|------------------------------------|------------------------------------|----------|------|
| Run1  | IAPSO-1   | FsLA/266/90um/60umRR/10Hz | 1.67421           | 37.58972         | 0.62047           | 7.33987          | 0.06119          | 10.78771                        | 2.69588                             | 5.12131                            | 0.336339                           | 0.000042 | 0.13 |
| Run2  | JB-1-20-1 | FsLA/266/90um/60umRR/10Hz | 2.85376           | 37.36291         | 1.03301           | 7.29471          | 0.02073          | 10.47075                        | 2.76016                             | 5.12192                            | 0.336321                           | 0.000113 | 0.34 |
| Run3  | IAPSO-2   | FsLA/266/90um/60umRR/10Hz | 1.77872           | 37.76856         | 0.65574           | 7.37389          | 0.05944          | 10.35022                        | 2.71030                             | 5.12193                            | 0.336406                           | 0.000039 | 0.12 |
| Run4  | JB-1-20-2 | FsLA/266/90um/60umRR/10Hz | 2.75999           | 37.58037         | 0.99873           | 7.33609          | 0.01778          | 10.05291                        | 2.76174                             | 5.12266                            | 0.336363                           | 0.000125 | 0.37 |
| Run5  | IAPSO-3   | FsLA/266/90um/60umRR/10Hz | 1.76983           | 37.97759         | 0.65154           | 7.41319          | 0.05954          | 10.00154                        | 2.71537                             | 5.12297                            | 0.336511                           | 0.000042 | 0.13 |
| Run14 | IAPSO-7   | FsLA/266/90um/60umRR/10Hz | 1.86345           | 37.65852         | 0.68102           | 7.35127          | 0.06479          | 8.86990                         | 2.73468                             | 5.12273                            | 0.336505                           | 0.000045 | 0.13 |
| Run15 | JB-3-4-1  | FsLA/266/90um/60umRR/10Hz | 2.91354           | 37.36214         | 1.04854           | 7.29341          | 0.01317          | 8.66919                         | 2.77701                             | 5.12274                            | 0.336336                           | 0.000111 | 0.33 |
| Run16 | IAPSO-8   | FsLA/266/90um/60umRR/10Hz | 1.71864           | 37.63426         | 0.62958           | 7.34668          | 0.05279          | 8.66274                         | 2.72796                             | 5.12263                            | 0.336487                           | 0.000046 | 0.14 |
| Run17 | JB-3-4-2  | FsLA/266/90um/60umRR/10Hz | 2.47563           | 37.37545         | 0.89403           | 7.29568          | 0.02723          | 8.41632                         | 2.76794                             | 5.12296                            | 0.336386                           | 0.000128 | 0.38 |
| Run18 | IAPSO-9   | FsLA/266/90um/60umRR/10Hz | 1.62477           | 37.56525         | 0.59611           | 7.33250          | 0.04689          | 8.47005                         | 2.72408                             | 5.12312                            | 0.336601                           | 0.000050 | 0.15 |
| Run19 | JB-3-5-1  | FsLA/266/90um/60umRR/10Hz | 1.84973           | 37.43496         | 0.67456           | 7.30715          | 0.01661          | 8.39756                         | 2.74170                             | 5.12307                            | 0.336359                           | 0.000061 | 0.18 |
| Run20 | IAPSO-10  | FsLA/266/90um/60umRR/10Hz | 1.73654           | 37.40401         | 0.63493           | 7.30121          | 0.05079          | 8.33508                         | 2.73326                             | 5.12299                            | 0.336508                           | 0.000040 | 0.12 |

Note: IAPSO: Standard ocean water AgCl; SE: standard error (n = 20); \*: signal intensity and isotope ratios from samples.
